# Supplementary material for: Equipping an adsorbent with an indicator: a novel composite to simultaneously detect and remove heavy metals from water
Source: Royal Society of Chemistry journal article supplement (doi:10.1039/c6ta04885d), 2016-01-01
Supplement: c6ta04885d1.pdf [file c6ta04885d1.pdf]

# Equip adsorbent with indicator: A novel composite to simultaneously detect and remove heavy metals from water

Hualin Jiang<sup>1,2</sup>, Weibo Zhang<sup>1,2</sup>, Pinghua Chen<sup>2</sup>, Weiwei Zhang<sup>3</sup>, Guoyao Wang<sup>3</sup>,  
Xubiao Luo<sup>1,2</sup>, Shenglian Luo<sup>1,2\*</sup>

1. Key Laboratory of Jiangxi Province for Persistent Pollutants Control and Resources Recycle, Nanchang 330063, PR China

2. College of Environmental and Chemical Engineering, Nanchang Hangkong University, Nanchang, 330063, PR China

3. Jiangxi Engineering Laboratory for Optoelectronics Testing Technology, Nanchang Hangkong University, Nanchang 330063, PR China

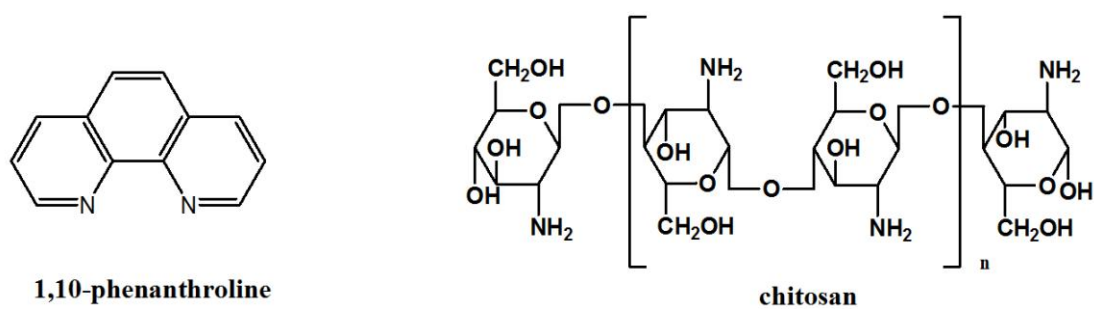

Figure. S1 The structures of 1,10-phenanthroline and chitosan

<sup>1</sup>HNMR analysis of 5-amino-phenanthroline

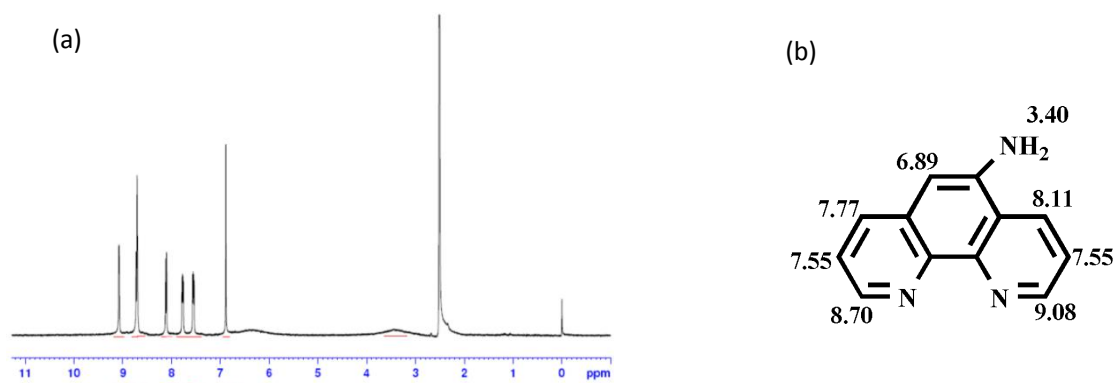

Figure. S2 (a) <sup>1</sup>HNMR spectrum of 5-amino-phenanthroline; (b) The assignment of H in the structure.

<sup>1</sup>HNMR (400 MHz, C<sub>6</sub>D<sub>6</sub>, δ): 3.40 (br, 2H, -NH<sub>2</sub>), 6.89 (s, 1H, 6-phen-H), 7.55 (m, 2H, 3, 8-phen-H), 7.77 (d, 1H, 7-phen-H), 8.11 (d, 1H, 4-phen-H), 8.70 (d, 1H, 9-phen-H), 9.08 (d, 1H, 2-phen-H).

Three solutions containing unknown concentrations of Fe(II) and other three solutions containing unknown concentrations of Cu(II) were measured by the composite and flame atom absorption spectrophotometry (FAAS), respectively. The results are listed in Table S1.

Table S1 Comparison of metal ions concentrations detected by the composite and FASS

| Fe(II)         |                |                | Cu(II)         |                |                |
|----------------|----------------|----------------|----------------|----------------|----------------|
| C <sub>C</sub> | C <sub>F</sub> | S <sub>b</sub> | C <sub>C</sub> | C <sub>F</sub> | S <sub>b</sub> |
| 0.62           | 0.61           | 1.6%           | 3.05           | 3.09           | -1.3%          |
| 0.90           | 0.89           | 1.1%           | 5.07           | 5.22           | -2.9%          |
| 1.34           | 1.4            | -4.3%          | 6.92           | 7.09           | -2.4%          |

C<sub>C</sub> are the concentrations determined by the composite; C<sub>F</sub> are the concentrations determined by FASS; S<sub>b</sub> are the deviations from C<sub>C</sub> to C<sub>F</sub>.

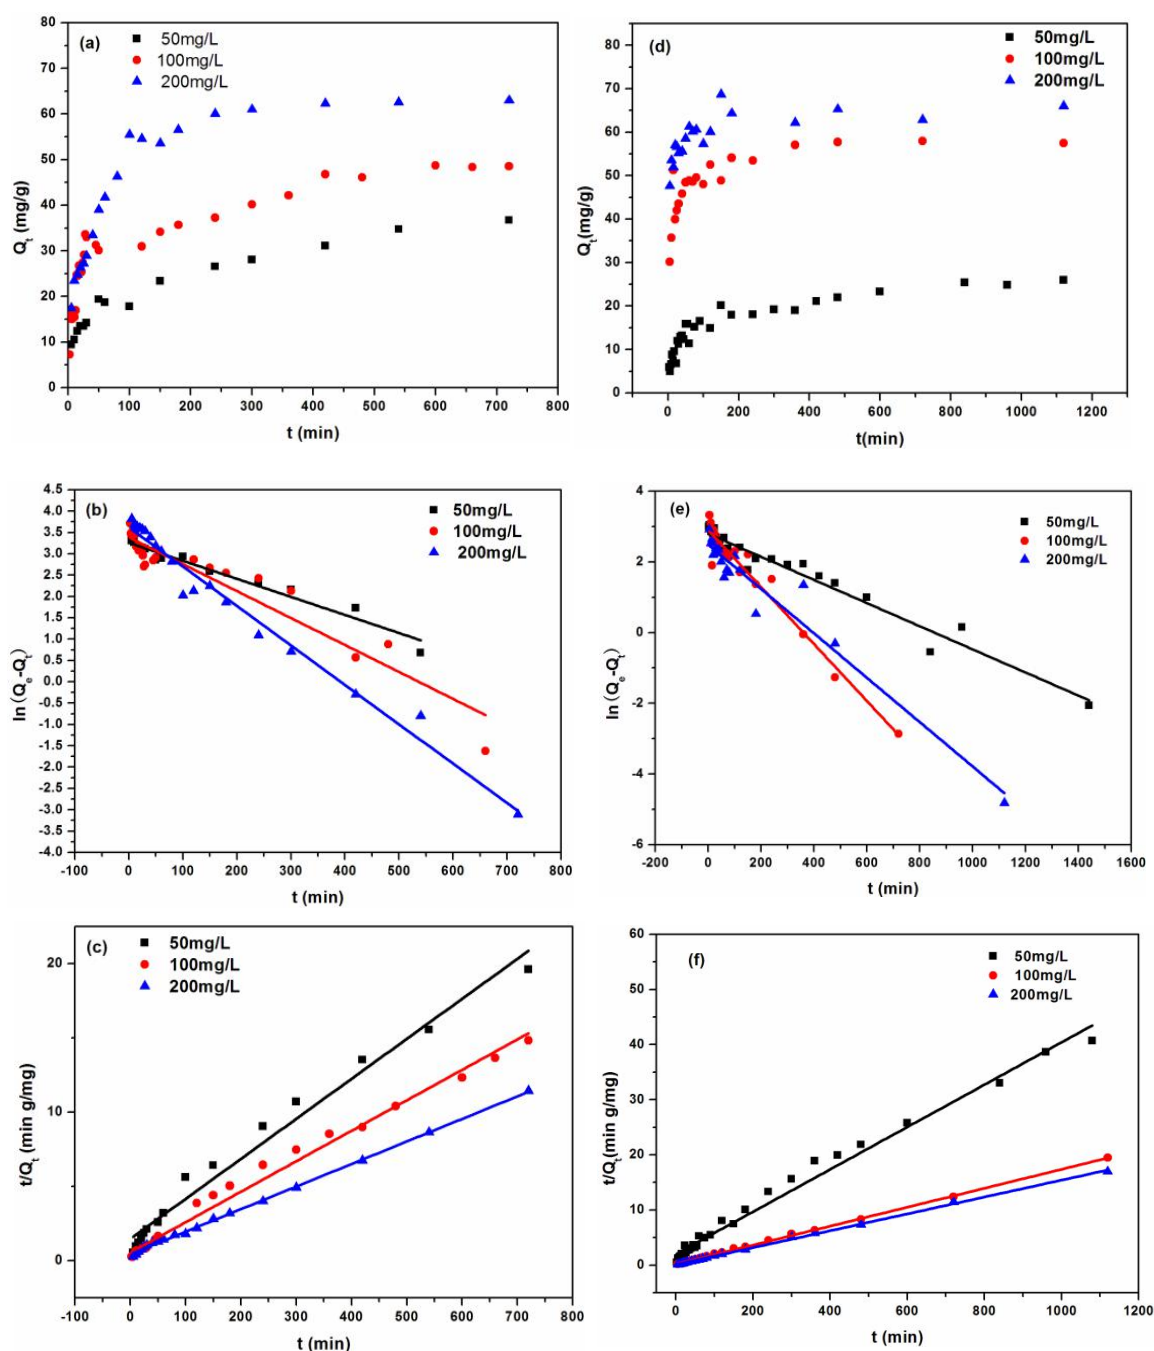

Figure.S4 (a) Adsorption capacity of Fe(II) vs. time with initial concentration of 50, 100 and 200 mg/L; (b) Curve fitting with Pseudo-first order kinetic model at different initial Fe (II) concentrations; (c) Curve fitting with Pseudo-second order order kinetic model at different initial Fe (II) concentrations; (d) Adsorption capacity of Cu (II) vs. time with initial concentration of 50, 100 and 200 mg/L; (e) Curve fitting with Pseudo-first order kinetic model at different initial Cu (II) concentrations; (f) Curve fitting with Pseudo-second order order kinetic model at different initial Cu (II) concentrations.
